# Supplementary material
Source: PubMed Central journal article supplement (PMC3813002)
Supplement: NIHMS135586-supplement-Supl__data.pdf [file NIHMS135586-supplement-Supl__data.pdf]

### **Effects of Mdm2 inhibition on PTEN-induced mut-p53 protein levels**

We used Nutlin-3 to assess the effects of PTEN on mut-p53 in the setting of inhibited Mdm2 binding to p53. Mut-p53 U373 cells were treated with 50  $\mu$ M Nutlin-3 one hour before infection with Ad-PTEN or Ad-control. Cell extracts were isolated after 24 hrs and immunoblotted for mut-p53 as described in the methods. The immunoblots shown below show that Nutlin-3 and PTEN additively induce mut-p53 protein levels. The additive effects of Nutlin-3 and PTEN can be explained by either an incomplete inhibition of Mdm2 binding by Nutlin-3 and/or by only partial dependence of PTEN-induced mut-p53 on Mdm2 inhibition.

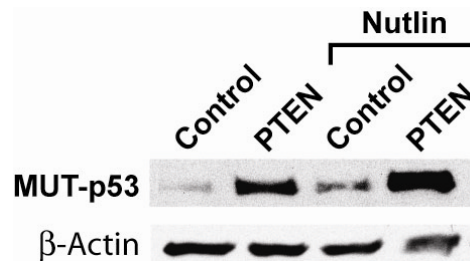

### **Exclusion of non-specific siRNA-induced anti-viral effects:**

To exclude siRNA/shRNA-induced non-specific antiviral effects, lysates from all experiments using siRNA/shRNA and control untreated lysates were immunoblotted for 2'-5'-oligoadenylate synthetase 3 (OAS3). OAS3 is an interferon-induced protein that is used to assess general antiviral responses to short nucleic acids. siRNA/shRNA did not induce the expression of OAS3 in any of the lysates tested and OAS3 expression levels were generally low in siRNA and control cells. A representative immunoblot from these experiments is shown below:

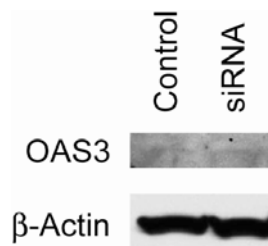

### **Determination of the mutational status of the cell lines used in the study:**

The mutational status of all cell lines used in the study was determined as described below:

#### **SNP Genotyping of p53-175 and p53-272**

The genotype for the alleles in U87, A172, U373, SNB19 and U1242 cell lines was determined by Taqman Allelic Discrimination method. The assay used two differently labeled fluorescent minor groove-binding (MGB) probes that match the sequence of the two alleles with a common pair of primers. The assay was designed with the aid of the Primer Express software (Applied Biosystems, Foster City, CA). The details of the assay are shown in the following table:

For p53-r175h

5'-CTACAAGCAGTCACAGCACATGAC-3'

5'-TCTGAGCAGCGCTCATGGT-3'

Forward

Reverse

5'6-FAM-TGTGAGGCaCTGCC-MGB-BHQ3'  
5'VIC-TTGTGAGGCgCTGC-MGB-BHQ3'

Probe1  
Probe2

For p53-r273h

5'-GTAATCTACTGGGACGGAACAGCT-3'  
5'-CTCTGTGCGCCGGTCTCT-3'  
5'6-FAM-TGAGGTGCaTGTTT-MGB-BHQ3'  
5'VIC-TGAGGTGCgTGTTT-MGB-BHQ3'

Forward  
Reverse  
Probe1-mbg-fam  
Probe2-mbg-vic

The genotyping was performed on an Applied Biosystems 7900-HT Sequence Detection systems instrument with the following cycle profile:

| (3) CYCLE (45 cycles) |             |             |               |
|-----------------------|-------------|-------------|---------------|
| (1) HOLD              | (2) HOLD    | Denature    | Anneal/Extend |
| Temp=50°C             | Temp=95°C   | Temp=95°C   | Temp=60°C     |
| Time=2 min            | Time=10 min | Time=15 sec | Time=45 sec   |

The autocall function with a 95% confidence setting was used to make the preliminary determination of the genotypes, which were then further examined by the displacement of a particular data point in the clusters.

### Regular Taqman Gene Quantification

Regular Taqman gene expression analysis was performed to further confirm the site mutation in the p53 amino acid positions #175 and #273. The primers and probes used were identical to the list above but only one probe was used in a certain reaction. The PCR conditions were the same as used for the allelic discrimination.

### Results:

U87: 175(G/G), 273(G/G)

CTACAAGCAGTCACAGCACATGACGGAGGTTGTGAGGC<sup>G</sup>CTGCCCCCACCATGAGCGCT  
GCTCAGATAGCGATGGTGAGCAGCTGGGGCTGGAGAGACGACAGGGCTGGTTGCCAGG  
GTCCCAGGCTCTGATTCCTCACTGATTGCTCTTAGGTCTGGCCCCTCCTCAGCATCTTA  
TCCGAGTGGAAGGAAATTTGCGTGTGGAGTATTTGGATGACAGAAACACTTTTTCGACATAG  
TGTGGTGGTGCCCTATGAGCCGCCTGAGGTCTGGTTT<sup>GCAACTGGGGTCTCTGGGAGGA</sup>  
GGGGTTAAGGGTGGTTGTCAGTGGCCCTCCAGGTGAGCAGTAGGGGGGCTTTCTCCTGC  
TGCTTATTTGACCTCCCTATAACCCCATGAGATGTGCAAAGTAAATGGGTTTAACTATTGCA  
CAGTTGAAAAAACTGAAGCTTACAGAGGCTAAGGGCCTCCCCTGCTTGGCTGGGCGCAGT  
GGCTCATGCCTGTAATCCCAGCACTTTGGGAGGCCAAGGCAGGCGGATCACGAGGTTGG  
GAGATCGAGACCATCCTGGCTAACGGTGAACCCCGTCTCTACTGAAAAATACAAAAAAA  
ATTAGCCGGGCGTGGTGCTGGGCACCTGTAGTCCCAGCTACTCGGGAGGCTGAGGAAGG  
AGAATGGCGTGAACCTGGGCGGTGGAGCTTGCAAGTGAAGTGAAGTGAAGTGAAGTGAAGT  
CCAGCCTGGGCGACAGAGCGAGATTCCATCTCAAAAAAAAAAAAAAAAAAGGCCTCCCCTGC  
TTGCCACAGGTCTCCCCAAGGCGCACTGGCCTCATCTTGGGCCTGTGTTATCTCCTAGGTT  
GGCTCTGACTGTACCACCATCCACTACAACACTACATGTGTAACAGTTCCTGCATGGGCGGCA  
TGAACCGGAGGCCCATCCTCACCATCATCACACTGGAAGACTCCAGGTCAGGAGCCACTT  
GCCACCCTGCACACTGGCCTGCTGTGCCCCAGCCTCTGCTTGCCTCTGACCCCTGGGCCC  
ACCTCTTACCGATTTCTTCCATACTACTACCCATCCACCTCTCATCACATCCCC<sup>GGCGGGG</sup>  
<sup>AATCTCCTTAC</sup>TGCTCCCCTCAGTTTTCTTTCTCTGGCTTTGGGACCTCTTAACCTGTGG  
CTTCTCCTCCACCTACCTGGAGCTGGAGCTTAGGCTCCAGAAAGGACAAGGGTGGTTGGG  
AGTAGATGGAGCCTGGTTTTTAAATGGGACAGGTAGGACCTGATTTCCCTTACTGCCTCTT  
GCTTCTTTTTCTATCCTGAGTAGTGGTAATCTACTGGGACGGAACAGCTTTGAGGTGC<sup>G</sup>  
TGTTTGTGCCTGTCCTGGGAGAGACCGGCGCACAGAGGAA

A172: 175(G/G), 273(G/G)

CTACAAGCAGTCACAGCACATGACGGAGGTTGTGAGGC<sup>G</sup>CTGCCCCCACCATGAGCGCT  
GCTCAGATAGCGATGGTGAGCAGCTGGGGCTGGAGAGACGACAGGGCTGGTTGCCAGG  
GTCCCCAGGCCTCTGATTCCTCACTGATTGCTCTTAGGTCTGGCCCCTCCTCAGCATCTTA  
TCCGAGTGGAAGGAAATTTGCGTGTGGAGTATTTGGATGACAGAAACACTTTTTCGACATAG  
TGTGGTGGTGCCCTATGAGCCGCCTGAGGTCTGGTTTG<sup>CAACTGGGGTCTCTGGGA</sup>GGA  
GGGGTTAAGGGTGGTTGTGAGTGGCCCTCCAGGTGAGCAGTAGGGGGGCTTTCTCCTGC  
TGCTTATTTGACCTCCCTATAACCCCATGAGATGTGCAAAGTAAATGGGTTTAACTATTGCA  
CAGTTGAAAAAACTGAAGCTTACAGAGGCTAAGGGCCTCCCCTGCTTGGCTGGGCGCAGT  
GGCTCATGCCTGTAATCCCAGCACTTTGGGAGGCCAAGGCAGGCGGATCACGAGGTTGG  
GAGATCGAGACCATCCTGGCTAACGGTGAAACCCCGTCTCTACTGAAAAATACAAAAAAA  
ATTAGCCGGGCGTGGTGCTGGGCACCTGTAGTCCCAGCTACTCGGGAGGCTGAGGAAGG  
AGAATGGCGTGAACCTGGGCGGTGGAGCTTGCAAGTGGAGTGGAGTACACGCCACTGCACT  
CCAGCCTGGGCGACAGAGCGAGATTCCATCTCAAAAAAAAAAAAAAAAAAGGCCTCCCCTGC  
TTGCCACAGGTCTCCCCAAGGCGCACTGGCCTCATCTTGGGCCTGTGTTATCTCCTAGGTT  
GGCTCTGACTGTACCACCATCCACTACAACACTACATGTGTAACAGTTCTGCATGGGCGGCA  
TGAACCGGAGGCCCATCCTCACCATCATCACACTGGAAGACTCCAGGTCAGGAGCCACTT  
GCCACCCTGCACACTGGCCTGCTGTGCCCCAGCCTCTGCTTGCCTCTGACCCCTGGGCC  
ACCTCTTACCGATTTCTTCCATACTACTACCCATCCACCTCTCATCACATCCCC<sup>GGCGGGG</sup>  
<sup>AATCTCCTTAC</sup>TGCTCCCCTCAGTTTTCTTTCTCTGGCTTTGGGACCTCTTAACCTGTGG  
CTTCTCCTCCACCTACCTGGAGCTGGAGCTTAGGCTCCAGAAAGGACAAGGGTGGTTGGG  
AGTAGATGGAGCCTGGTTTTTTAAATGGGACAGGTAGGACCTGATTTCTTACTGCCTCTT  
GCTTCTTTTTCTATCCTGAGTAGTGTAATCTACTGGGACGGAACAGCTTTGAGGTGC<sup>G</sup>  
TGTTTGTGCCTGTCCTGGGAGAGACCGGCGCACAGAGGAA

U373: 175(G/G), 273(A/A)

CTACAAGCAGTCACAGCACATGACGGAGGTTGTGAGGC<sup>G</sup>CTGCCCCCACCATGAGCGCT  
GCTCAGATAGCGATGGTGAGCAGCTGGGGCTGGAGAGACGACAGGGCTGGTTGCCAGG  
GTCCCCAGGCCTCTGATTCCTCACTGATTGCTCTTAGGTCTGGCCCCTCCTCAGCATCTTA  
TCCGAGTGGAAGGAAATTTGCGTGTGGAGTATTTGGATGACAGAAACACTTTTTCGACATAG  
TGTGGTGGTGCCCTATGAGCCGCCTGAGGTCTGGTTTG<sup>CAACTGGGGTCTCTGGGA</sup>GGA  
GGGGTTAAGGGTGGTTGTGAGTGGCCCTCCAGGTGAGCAGTAGGGGGGCTTTCTCCTGC  
TGCTTATTTGACCTCCCTATAACCCCATGAGATGTGCAAAGTAAATGGGTTTAACTATTGCA  
CAGTTGAAAAAACTGAAGCTTACAGAGGCTAAGGGCCTCCCCTGCTTGGCTGGGCGCAGT  
GGCTCATGCCTGTAATCCCAGCACTTTGGGAGGCCAAGGCAGGCGGATCACGAGGTTGG  
GAGATCGAGACCATCCTGGCTAACGGTGAAACCCCGTCTCTACTGAAAAATACAAAAAAA  
ATTAGCCGGGCGTGGTGCTGGGCACCTGTAGTCCCAGCTACTCGGGAGGCTGAGGAAGG  
AGAATGGCGTGAACCTGGGCGGTGGAGCTTGCAAGTGGAGTGGAGTACACGCCACTGCACT  
CCAGCCTGGGCGACAGAGCGAGATTCCATCTCAAAAAAAAAAAAAAAAAAGGCCTCCCCTGC  
TTGCCACAGGTCTCCCCAAGGCGCACTGGCCTCATCTTGGGCCTGTGTTATCTCCTAGGTT  
GGCTCTGACTGTACCACCATCCACTACAACACTACATGTGTAACAGTTCTGCATGGGCGGCA  
TGAACCGGAGGCCCATCCTCACCATCATCACACTGGAAGACTCCAGGTCAGGAGCCACTT  
GCCACCCTGCACACTGGCCTGCTGTGCCCCAGCCTCTGCTTGCCTCTGACCCCTGGGCC  
ACCTCTTACCGATTTCTTCCATACTACTACCCATCCACCTCTCATCACATCCCC<sup>GGCGGGG</sup>  
<sup>AATCTCCTTAC</sup>TGCTCCCCTCAGTTTTCTTTCTCTGGCTTTGGGACCTCTTAACCTGTGG  
CTTCTCCTCCACCTACCTGGAGCTGGAGCTTAGGCTCCAGAAAGGACAAGGGTGGTTGGG  
AGTAGATGGAGCCTGGTTTTTTAAATGGGACAGGTAGGACCTGATTTCTTACTGCCTCTT  
GCTTCTTTTTCTATCCTGAGTAGTGTAATCTACTGGGACGGAACAGCTTTGAGGTGC<sup>A</sup>  
TGTTTGTGCCTGTCCTGGGAGAGACCGGCGCACAGAGGAA

SnB19: 175(G/G), 273(A/A)

CTACAAGCAGTCACAGCACATGACGGAGGTTGTGAGGC<sup>G</sup>CTGCCCCCACCATGAGCGCT  
GCTCAGATAGCGATGGTGAGCAGCTGGGGCTGGAGAGACGACAGGGCTGGTTGCCAGG  
GTCCCCAGGCCTCTGATTCCTCACTGATTGCTCTTAGGTCTGGCCCCTCCTCAGCATCTTA  
TCCGAGTGGAAGGAAATTTGCGTGTGGAGTATTTGGATGACAGAAACACTTTTTCGACATAG

TGTGGTGGTGCCCTATGAGCCGCCTGAGGTCTGGTTTGCAACTGGGGTCTCTGGGAGGA  
GGGGTTAAGGGTGGTTGTCAGTGGCCCTCCAGGTGAGCAGTAGGGGGGCTTTCTCCTGC  
TGCTTATTTGACCTCCCTATAACCCCATGAGATGTGCAAAGTAAATGGGTTTAACTATTGCA  
CAGTTGAAAAAACTGAAGCTTACAGAGGCTAAGGGCCTCCCCTGCTTGGCTGGGCGCAGT  
GGCTCATGCCTGTAATCCCAGCACTTTGGGAGGCCAAGGCAGGCGGATCACGAGGTTGG  
GAGATCGAGACCATCCTGGCTAACGGTGAAACCCCGTCTCTACTGAAAAATACAAAAAAA  
ATTAGCCGGGCGTGGTGCTGGGCACCTGTAGTCCCAGCTACTCGGGAGGCTGAGGAAGG  
AGAATGGCGTGAACCTGGGCGGTGGAGCTTGCAAGTGGAGCTGAGATCACGCCACTGCACT  
CCAGCCTGGGCGACAGAGCGAGATTCCATCTCAAAAAAAAAAAAAAAAAAGGCCTCCCCTGC  
TTGCCACAGGTCTCCCAAGGCGCACTGGCCTCATCTTGGGCCTGTGTTATCTCCTAGGTT  
GGCTCTGACTGTACCACCATCCACTACAACCTACATGTGTAACAGTTCCTGCATGGGCGGCA  
TGAACCGGAGGCCCATCCTCACCATCATCACACTGGAAGACTCCAGGTCAGGAGCCACTT  
GCCACCCTGCACACTGGCCTGCTGTGCCCCAGCCTCTGCTTGCCTCTGACCCCTGGGCCC  
ACCTCTTACCGATTTCTTCCATACTACTACCCATCCACCTCTCATCACATCCCCGGCGGGG  
AATCTCCTTAC

TGCTCCCCTCAGTTTTCTTTCTCTGGCTTTGGGACCTCTTAACCTGTGG  
CTTCTCCTCCACCTACCTGGAGCTGGAGCTTAGGCTCCAGAAAGGACAAGGGTGGTTGGG  
AGTAGATGGAGCCTGGTTTTTAAATGGGACAGGTAGGACCTGATTTCCCTTACTGCCTCTT  
GCTTCTTTTTCTATCCTGAGTAGTGGTAATCTACTGGGACGGAACAGCTTTGAGGTGCA  
TGTGTGCTGCTCCTGGGAGAGACCGGCGCACAGAGGAA

U1242: 175(A/A), 273(G/G)

CTACAAGCAGTCACAGCACATGACGGAGGTTGTGAGGCCTGCCCCCACCATGAGCGCTG  
CTCAGATAGCGATGGTGAGCAGCTGGGGCTGGAGAGACGACAGGGCTGGTTGCCAGGG  
TCCCCAGGCCTCTGATTCTCACTGATTGCTCTTAGGTCTGGCCCCCTCCTCAGCATCTTAT  
CCGAGTGAAGGAAATTTGCGTGTGGAGTATTTGGATGACAGAAACACTTTTCGACATAGT  
GTGGTGGTGCCCTATGAGCCGCCTGAGGTCTGGTTTGCAACTGGGGTCTCTGGGAGGAG  
GGGTTAAGGGTGGTTGTCAGTGGCCCTCCAGGTGAGCAGTAGGGGGGCTTTCTCCTGCT  
GCTTATTTGACCTCCCTATAACCCCATGAGATGTGCAAAGTAAATGGGTTTAACTATTGCAC  
AGTTGAAAAAACTGAAGCTTACAGAGGCTAAGGGCCTCCCCTGCTTGGCTGGGCGCAGTG  
GCTCATGCCTGTAATCCCAGCACTTTGGGAGGCCAAGGCAGGCGGATCACGAGGTTGGG  
AGATCGAGACCATCCTGGCTAACGGTGAAACCCCGTCTCTACTGAAAAATACAAAAAAA  
TTAGCCGGGCGTGGTGCTGGGCACCTGTAGTCCCAGCTACTCGGGAGGCTGAGGAAGGA  
GAATGGCGTGAACCTGGGCGGTGGAGCTTGCAAGTGGAGCTGAGATCACGCCACTGCACTC  
CAGCCTGGGCGACAGAGCGAGATTCCATCTCAAAAAAAAAAAAAAAAAAGGCCTCCCCTGCTT  
GCCACAGGTCTCCCAAGGCGCACTGGCCTCATCTTGGGCCTGTGTTATCTCCTAGGTTG  
GCTCTGACTGTACCACCATCCACTACAACCTACATGTGTAACAGTTCCTGCATGGGCGGCAT  
GAACCGGAGGCCCATCCTCACCATCATCACACTGGAAGACTCCAGGTCAGGAGCCACTTG  
CCACCCTGCACACTGGCCTGCTGTGCCCCAGCCTCTGCTTGCCTCTGACCCCTGGGCCCCA  
CCTCTTACCGATTTCTTCCATACTACTACCCATCCACCTCTCATCACATCCCCGGCGGGGA  
ATCTCCTTAC

TGCTCCCCTCAGTTTTCTTTCTCTGGCTTTGGGACCTCTTAACCTGTGGC  
TTCTCCTCCACCTACCTGGAGCTGGAGCTTAGGCTCCAGAAAGGACAAGGGTGGTTGGGA  
GTAGATGGAGCCTGGTTTTTAAATGGGACAGGTAGGACCTGATTTCCCTTACTGCCTCTTG  
CTTCTTTTTCTATCCTGAGTAGTGGTAATCTACTGGGACGGAACAGCTTTGAGGTGCGT  
GTTTGTGCTGCTCCTGGGAGAGACCGGCGCACAGAGGAA
